# Supplementary material
Source: PubMed Central journal article supplement (PMC5769867)

# THE LANCET

## Diabetes & Endocrinology

### Supplementary appendix

This appendix formed part of the original submission and has been peer reviewed.  
We post it as supplied by the authors.

Supplement to: Basu S, Sussman JB, Berkowitz SA, Hayward RA, Yudkin JS.  
Development and validation of Risk Equations for Complications Of type 2  
Diabetes (RECODE) using individual participant data from randomised trials.  
*Lancet Diabetes Endocrinol* 2017; published online Aug 10. [http://dx.doi.org/10.1016/S2213-8587\(17\)30221-8](http://dx.doi.org/10.1016/S2213-8587(17)30221-8).

## Web Extra Material

### Statistical code.

Statistical code (in R) for replication and extension of the analyses conducted in this study is available at:

<https://github.com/sanjaybasu/t2dmriskeqns>

### Elastic net regularization.

Elastic net regularization seeks to select predictors from a set of candidate variables with the goal of generating parsimonious models by minimizing overfitting, while preserving a high degree of predictive power, assessed through repeated internal cross-validation.<sup>39,40</sup> Elastic net regularization utilizes a combination of ridge regression and lasso regression. Ridge regression shrinks coefficients of correlated predictors towards each other, while lasso regression penalizes nonzero regression coefficients, choosing one correlated predictor and discarding the others. Elastic net mixes ridge and lasso regression by adjusting the penalty parameter to balance the two methods.

Given a standard Cox hazard model of the form:

$$[1] \quad h_i(t) = h_0(t)e^{x_i^T \beta},$$

where  $h_i(t)$  is the hazard for patient  $i$  at time  $t$ ,  $h_0(t)$  is a shared baseline hazard rate, and  $\beta$  is a vector of model coefficients for a vector of predictors  $x_i$ , the elastic net regularization approach penalizes the negative log of the partial likelihood function for the Cox model, given by:

$$[2] \quad L(\beta) = \prod_{i=1}^m \frac{e^{x_{j(i)}^T \beta}}{\sum_{j \in R_i} e^{x_j^T \beta}}$$

where  $R$  is the set of indices  $j$  for failure among participants at risk at time  $t_i$  across all possible times 1 to  $m$ . The objective is to find  $\beta$  that maximizes  $L(\beta)$ , while also minimizing over-fitting. This is equivalent to maximizing a scaled log partial likelihood, which in a scaled Lagrangian reformulation derived previously,<sup>39</sup> producing the objective function:

$$[3] \quad \hat{\beta} = \operatorname{argmax}_{\beta} \left[ \frac{2}{n} \left( \sum_{i=1}^m x_{j(i)}^T - \log \left( \sum_{j \in R_i} e^{x_j^T \beta} \right) \right) - \lambda P_{\alpha}(\beta) \right]$$

where  $\lambda P_{\alpha}(\beta)$  is the elastic net penalty:

$$[4] \quad \lambda P_{\alpha}(\beta) = \lambda \left( \alpha \sum_{i=1}^p |\beta_i| + \frac{1}{2} (1 - \alpha) \sum_{i=1}^p \beta_i^2 \right)$$

As shown in equation 4, the parameter  $\alpha$  balances between lasso regression ( $\alpha=1$ , which tends to pick one correlated parameter and discard the others) and ridge regression ( $\alpha=0$ , which tends to shrink correlated predictor coefficients toward each other). The parameter  $\lambda$  controls the overall degree of the penalty and selects the degree to which the model will be more or less parsimonious (i.e., higher  $\lambda$  values select fewer candidate parameters to produce a less over-fit model).

The method was implemented using the `glmnet` package in the statistical program *R*. The `glmnet` algorithm uses cyclical coordinate descent, which successively optimizes the objective function over each parameter with others fixed, and cycles repeatedly until convergence.<sup>41</sup>

The parameter  $\lambda$  value that minimized the partial likelihood deviance of the model (the error between the model and observed outcomes) over the course of 10-times repeated internal cross-validation in the ACCORD sample was chosen for each Cox model. In 10-fold internal cross-validation, the original sample is randomly partitioned into 10 equal sized subsamples. Of the 10 subsamples, a single subsample is retained as the validation data for testing the model, and the remaining 9 subsamples are used as training data. The cross-validation process is then repeated 10 times, with each of the 10 subsamples used exactly once as the validation data. The 10 results are then averaged to provide a coefficient estimate. The advantage of this method over repeated random sub-sampling is that all observations are used for both training and validation, and each observation is used for validation exactly once. The choice of ten cross-validations, or any number of such validations, is inherently arbitrary and ten is conventional, but we also checked that the choice of ten validations was produced stable estimates of covariates selected and coefficient values.

#### **Additional details on derivation and validation datasets**

##### *Derivation data.*

ACCORD included a randomized, controlled trial of intensive versus standard glycemetic control (open-label target of hemoglobin A1c <6.0% versus 7.0-7.9%, respectively), with a multi-factorial design in which participants in the glycemetic control trial were additionally randomized to intensive versus standard lipid treatment (double-blinded assignment to fibrate plus statin or placebo plus statin, respectively), or intensive versus standard blood pressure treatment (open-label target of systolic blood pressure <120 mmHg or <140 mmHg, respectively). The study was conducted in the United States and Canada between January 2001 and June 2009. The study was terminated early due to higher mortality in the intensive compared to standard glycemetic treatment group. Participants were 40 to 79 years old with type 2 diabetes and a hemoglobin A1c level of at least 7.5%, and either prior evidence of cardiovascular disease (CVD) or risk factors for CVD (dyslipidemia, hypertension, smoking or obesity, main text **Table 1**). Exclusion criteria for ACCORD included having a body mass index greater than 45 kg/m<sup>2</sup>, serum creatinine greater than 1.5 mg/dL, or serious illnesses that might limit trial participation or life expectancy.

##### *Validation data.*

The Diabetes Prevention Program Outcomes Study (DPPOS) was used for validation of the microvascular risk equations. DPPOS was the follow-up to the randomized, controlled Diabetes Prevention Program (DPP) trial of metformin, troglitazone, lifestyle or placebo (with double-blinding of medication arms). DPP was conducted in the United States between January 1996 and July 2001, followed by the

DPPOS follow-up through October 2013. All DPP completers were offered DPPOS enrolment. DPP participants in the metformin arm continued open-label metformin in DPPOS until diabetes diagnosis, at which point study medication was deferred to the patient's primary care provider but participation in DPPOS continued. DPP participants in the lifestyle and placebo arms were offered group lifestyle classes in DPPOS. DPP/DPPOS inclusion criteria included age at least 25 years old, body mass index of  $\geq 24$  kg/m<sup>2</sup> for non-Asians or  $\geq 22$  kg/m<sup>2</sup> for Asians, a plasma glucose concentration of 95 to 125 mg/dL fasting, and glucose of 140 to 199 mg/dL two hours after a 75-g oral glucose load (main text **Table 1**). DPP/DPPOS excluded persons taking medications known to alter glucose tolerance or persons having serious illnesses that might limit trial participation or life expectancy. Trial data from individual participants who developed type 2 diabetes at any point during the DPP/DPPOS, across all study arms except the troglitazone arm (which was canceled early in the DPP due to liver toxicity), were included for microvascular equation validation (main text **Table 1**).

The Action for Health in Diabetes trial (Look AHEAD), used for validation of the macrovascular risk equations, was a randomized, controlled trial of intensive lifestyle modification versus diabetes support and education. Look AHEAD was conducted in the United States between January 2001 and September 2012. Look AHEAD inclusion criteria included age 45 to 75 years old; having type 2 diabetes with a haemoglobin A1c of  $\leq 11\%$ , a blood pressure of  $<160/100$  mmHg, and triglycerides  $<600$  mg/dL; and having a body mass index of at least 25 kg/m<sup>2</sup> (main text **Table 1**). Look AHEAD excluded persons unable to complete a maximal exercise test, those not having a primary care provider, and those having serious illnesses that might limit trial participation or life expectancy. Trial data from individual participants, across all study arms, were included for macrovascular equation validation (main text **Table 1**).

Web Extra Material Table 1. Model performance if including persons with missing data, using multiple imputation with chained equations for missing covariates.

| Equation                               | Internal validation: RECODE         |                                                   | External validation: RECODE        |                                                   | Alternative risk equations: UKPDS OM2 |                                                   | Alternative risk equations: ACC/AHA PCE's |                                                   |
|----------------------------------------|-------------------------------------|---------------------------------------------------|------------------------------------|---------------------------------------------------|---------------------------------------|---------------------------------------------------|-------------------------------------------|---------------------------------------------------|
|                                        | Discrimination: C-statistic         | Calibration: Slope/intercept/ $\chi^2$ , P-value* | Discrimination: C-statistic        | Calibration: Slope/intercept/ $\chi^2$ , P-value* | Discrimination: C-statistic           | Calibration: Slope/intercept/ $\chi^2$ , P-value* | Discrimination: C-statistic               | Calibration: Slope/intercept/ $\chi^2$ , P-value* |
| <b>Microvascular outcomes</b>          | ACCORD study (N = 9,635, 2001-2009) |                                                   | DPPOS study (N = 1,018, 1996-2001) |                                                   | ACCORD study (N = 9,635, 2001-2009)   |                                                   |                                           |                                                   |
| <b>Nephropathy</b>                     |                                     |                                                   |                                    |                                                   |                                       |                                                   |                                           |                                                   |
| (i) Microalbuminuria                   | 0.62 (0.61, 0.64)                   | 0.94/0.015/5.7, 0.77                              |                                    |                                                   |                                       |                                                   |                                           |                                                   |
| (ii) Macroalbuminuria                  | 0.84 (0.82, 0.86)                   | 1.14/-0.009/79.4*, <0.0001                        |                                    |                                                   |                                       |                                                   |                                           |                                                   |
| (iii) Renal failure/ESRD               | 0.60 (0.56, 0.64)                   | 1.28/0.0003/30.8*, <0.0001                        |                                    |                                                   | 0.54 (0.50, 0.59)                     |                                                   | 0.19/0.035/242.6*, <0.0001                |                                                   |
| (iv) 2x SCr or >20 mL/min decr in eGFR | 0.76 (0.75, 0.77)                   | 0.91/0.053/42.9*, <0.0001                         |                                    |                                                   |                                       |                                                   |                                           |                                                   |
| (v) Any of ii-iv                       | 0.74 (0.73, 0.75)                   | 0.88/0.073/64.3*, <0.0001                         |                                    |                                                   |                                       |                                                   |                                           |                                                   |
| (vi) Any of i-iii                      | 0.61 (0.60, 0.63)                   | 0.96/0.011/4.6, 0.87                              | 0.65 (0.61, 0.70)                  | 1.31/-0.15/9.3, 0.16                              |                                       |                                                   |                                           |                                                   |
| <b>Retinopathy</b>                     |                                     |                                                   |                                    |                                                   |                                       |                                                   |                                           |                                                   |
| (i) photocoagulation or vitrectomy     | 0.65 (0.63, 0.67)                   | 1.03/-0.003/15.7, 0.07                            | 0.57 (0.51, 0.63)                  | 0.72/0.12/13.9, 0.05                              |                                       |                                                   |                                           |                                                   |
| (ii) cataract extraction               | 0.68 (0.66, 0.69)                   | 0.97/0.004/18.7*, 0.03                            |                                    |                                                   |                                       |                                                   |                                           |                                                   |
| (iii) 3-line change in acuity          | 0.56 (0.55, 0.57)                   | 0.87/0.052/11.1, 0.27                             |                                    |                                                   |                                       |                                                   |                                           |                                                   |
| (iv) severe vision loss                | 0.62 (0.60, 0.64)                   | 1.01/-0.001/6.9, 0.65                             |                                    |                                                   | 0.59 (0.57, 0.62)                     |                                                   | 1.12/0.041/59.0*, <0.0001                 |                                                   |
| (v) any of i or iv                     | 0.63 (0.62, 0.65)                   | 0.97/0.004/11.5, 0.24                             |                                    |                                                   |                                       |                                                   |                                           |                                                   |
| <b>Neuropathy</b>                      |                                     |                                                   |                                    |                                                   |                                       |                                                   |                                           |                                                   |
| (i) MNSI >2                            | 0.60 (0.59, 0.62)                   | 1.01/-0.005/14.4, 0.11                            |                                    |                                                   |                                       |                                                   |                                           |                                                   |
| (ii) vibratory sensation loss          | 0.64 (0.63, 0.66)                   | 0.99/0.003/17.2, 0.05                             |                                    |                                                   |                                       |                                                   |                                           |                                                   |
| (iii) ankle jerk loss                  | 0.57 (0.55, 0.58)                   | 0.96/0.019/5.0, 0.84                              |                                    |                                                   |                                       |                                                   |                                           |                                                   |
| (iv) pressure sensation loss           | 0.62 (0.61, 0.64)                   | 1.00/-0.0005/9.7, 0.37                            | 0.69 (0.63, 0.74)                  | 1.01/-0.002/1.0, 0.91                             |                                       |                                                   |                                           |                                                   |

| <b>Macrovascular outcomes</b> | ACCORD study ( <i>N</i> = 9,635, 2001-2009) |                        | Look AHEAD study ( <i>N</i> = 4,760, 2001-2012) |                             | ACCORD study ( <i>N</i> = 9,635, 2001-2009) and Look AHEAD study ( <i>N</i> = 4,760, 2001-2012) |                                                                                   | ACCORD study ( <i>N</i> = 9,635, 2001-2009) and Look AHEAD study ( <i>N</i> = 4,760, 2001-2012) |                                                                                |
|-------------------------------|---------------------------------------------|------------------------|-------------------------------------------------|-----------------------------|-------------------------------------------------------------------------------------------------|-----------------------------------------------------------------------------------|-------------------------------------------------------------------------------------------------|--------------------------------------------------------------------------------|
| (i) ASCVD                     | 0.69 (0.67, 0.71)                           | 1.06/-0.005/13.7, 0.14 | 0.73 (0.71, 0.75)                               | 1.13/-0.071/203.1*, <0.0001 | 0.62 (0.60, 0.63) in ACCORD, 0.67 (0.64, 0.69) in Look AHEAD                                    | 0.36/0.043/602.6*, <0.0001 in ACCORD, 0.53/-0.013/746.6*, <0.0001 in Look AHEAD   | 0.61 (0.59, 0.63) in ACCORD, 0.66 (0.64, 0.69) in Look AHEAD                                    | 0.30/0.077/468.8*, <0.0001 in ACCORD, 0.39/0.032/444.0*, <0.0001 in Look AHEAD |
| (ii) MI (fatal/nonfatal)      | 0.69 (0.67, 0.70)                           | 1.00/0.0003/6.4, 0.70  | 0.71 (0.68, 0.74)                               | 1.08/-0.016/17.0, 0.05      | 0.62 (0.59, 0.64) in ACCORD, 0.67 (0.65, 0.70) in Look AHEAD                                    | 0.80/0.106/47.6*, <0.0001 in ACCORD, 0.94/-0.038/270.9*, <0.0001 in Look AHEAD    |                                                                                                 |                                                                                |
| (iii) Stroke (fatal/nonfatal) | 0.70 (0.66, 0.74)                           | 1.16/-0.003/7.4, 0.38  | 0.67 (0.63, 0.71)                               | 0.99/0.006/8.2, 0.22        | 0.61 (0.56, 0.66) in ACCORD, 0.63 (0.58, 0.68) in Look AHEAD                                    | 0.063/0.023/2275.6*, <0.0001 in ACCORD, 0.279/0.007/659.5*, <0.0001 in Look AHEAD |                                                                                                 |                                                                                |
| (iv) CHF                      | 0.75 (0.73, 0.77)                           | 1.01/-0.0004/3.1, 0.93 | 0.76 (0.73, 0.80)                               | 1.13/-0.011/11.7, 0.07      | 0.61 (0.58, 0.65) in ACCORD, 0.61 (0.57, 0.65) in Look AHEAD                                    | 0.46/0.006/345.8*, <0.0001 in ACCORD, 0.24/0.010/1246.5*, <0.0001 in Look AHEAD   |                                                                                                 |                                                                                |
| (v) CVD death                 | 0.74 (0.71, 0.77)                           | 0.96/0.001/7.8, 0.46   | 0.79 (0.74, 0.83)                               | 1.00/-0.010/44.5*, <0.0001  |                                                                                                 |                                                                                   |                                                                                                 |                                                                                |
| <b>All-cause mortality</b>    | 0.70 (0.68, 0.72)                           | 1.03/-0.002/14.7, 0.10 | 0.71 (0.68, 0.74)                               | 1.10/-0.012/16.3, 0.06      |                                                                                                 |                                                                                   |                                                                                                 |                                                                                |

See Methods for definitions of microvascular outcomes. 95% confidence intervals in parentheses around C-statistics are from 10-times cross-validations. Calibration slopes/intercepts are calculated between deciles of predicted and observed Kaplan-Meier event rates, with lower numbers of centiles than deciles used if <5 events are observed per group, to prevent unstable inferences per current guidelines.

Legend: MNSI = Michigan Neuropathy Screening Instrument; CVD = cardiovascular disease; ASCVD = atherosclerotic cardiovascular disease (nonfatal or fatal myocardial infarction or stroke); MI = myocardial infarction; CHF = congestive heart failure

\*P-values <0.05 reflect larger difference between predicted and observed Kaplan-Meier event rates by the Greenwood-D'Agostino-Nam test (see Figure 1 for calibration plots).

**Web Extra Material Table 2.** Reclassification numbers and net reclassification indices (NRI) by outcome, for the derivation cohort, ACCORD ( $N = 9,635$ , 2001-2009).

Risk predictions from new RECODE equations compared to predictions of older risk equations from the UK Prospective Diabetes Study Outcomes Model 2 (UKPDS OM2) and the American College of Cardiology/American Heart Association Pooled Cohort Equations (ACC/AHA PCEs). The tables show how many people with and without observed events were correctly and incorrectly classified as high or low risk by the older risk equations and by the newer RECODE equations. Positive NRI values indicate overall improvement from the older to the newer RECODE equations.

(A)

Nephropathy: renal failure/ESRD

|                           |       | New RECODE equations |      |       |
|---------------------------|-------|----------------------|------|-------|
|                           |       | <=10%                | >10% | Total |
| People without any events |       |                      |      |       |
| UKPDS OM2                 | <=10% | 7,193                | 9    | 7,202 |
|                           | >10%  | 1456                 | 70   | 1,526 |
|                           | Total | 8,649                | 79   | 8,728 |

People with events

|           |     | <=10% | >10% | Total |
|-----------|-----|-------|------|-------|
| UKPDS OM2 |     |       |      |       |
| <=10%     | 194 | 0     | 194  |       |
| >10%      | 54  | 19    | 73   |       |
| Total     | 248 | 19    | 267  |       |

NRI

0.161875188

(B)

Retinopathy:  
severe vision  
loss

New RECODE equations

|                           | <=10% | >10%  | Total |
|---------------------------|-------|-------|-------|
| People without any events |       |       |       |
| UKPDS OM2                 |       |       |       |
| <=10%                     | 6,459 | 577   | 7,036 |
| >10%                      | 641   | 583   | 1,224 |
| Total                     | 7,100 | 1,160 | 8,260 |

People with events

|           | <=10% | >10% | Total |
|-----------|-------|------|-------|
| UKPDS OM2 |       |      |       |
| <=10%     | 459   | 100  | 559   |
| >10%      | 73    | 103  | 176   |
| Total     | 532   | 203  | 735   |

NRI

0.027712311



(C)

ASCVD

New RECODE equations

|                           | <=10% | >10%  | Total |       |
|---------------------------|-------|-------|-------|-------|
| People without any events |       |       |       |       |
| UKPDS OM2                 | <=10% | 461   | 7     | 468   |
|                           | >10%  | 6289  | 1,368 | 7,657 |
|                           |       |       |       |       |
| Total                     | 6,750 | 1,375 | 8,125 |       |

People with events

|           | <=10% | >10% | Total |     |
|-----------|-------|------|-------|-----|
| UKPDS OM2 | <=10% | 26   | 2     | 28  |
|           | >10%  | 496  | 346   | 842 |
|           |       |      |       |     |
| Total     | 522   | 348  | 870   |     |

NRI

12.6071981

(D)

MI

New RECODE equations

People without any events

UKPDS OM2

|       | <=5% | >5%   | Total |
|-------|------|-------|-------|
|       |      |       |       |
| <=5%  | 63   | 143   | 206   |
| >5%   | 330  | 7,726 | 8,056 |
|       |      |       |       |
| Total | 393  | 7,869 | 8,262 |

People with events

UKPDS OM2

|       | <=5% | >5% | Total |
|-------|------|-----|-------|
|       |      |     |       |
| <=5%  | 0    | 6   | 6     |
| >5%   | 6    | 721 | 727   |
|       |      |     |       |
| Total | 6    | 727 | 733   |

NRI

0.882075472

(E)

Stroke

New RECODE equations

|                           | <=5%  | >5%   | Total |       |
|---------------------------|-------|-------|-------|-------|
| People without any events |       |       |       |       |
| UKPDS OM2                 | <=5%  | 1,288 | 11    | 1,299 |
|                           | >5%   | 7082  | 457   | 7,539 |
|                           |       |       |       |       |
|                           | Total | 8,370 | 468   | 8,838 |

People with events

|           | <=5%  | >5% | Total |     |
|-----------|-------|-----|-------|-----|
| UKPDS OM2 | <=5%  | 16  | 1     | 17  |
|           | >5%   | 113 | 27    | 140 |
|           |       |     |       |     |
|           | Total | 129 | 28    | 157 |

NRI

5.358515071

(F)

CHF

New RECODE equations

People without any events

UKPDS OM2

|       | <=10% | >10%  | Total |
|-------|-------|-------|-------|
|       |       |       |       |
| <=10% | 1,225 | 219   | 1,444 |
| >10%  | 5777  | 1,372 | 7,149 |
|       |       |       |       |
| Total | 7,002 | 1,591 | 8,593 |

People with events

UKPDS OM2

|       | <=10% | >10% | Total |
|-------|-------|------|-------|
|       |       |      |       |
| <=10% | 28    | 27   | 55    |
| >10%  | 164   | 183  | 347   |
|       |       |      |       |
| Total | 192   | 210  | 402   |

NRI

3.689528789

(G)

ACC/AHA ASCVD

New RECODe equations

|                           | <=10% | >10%  | Total |
|---------------------------|-------|-------|-------|
| People without any events |       |       |       |
| ACC/AHA PCEs              |       |       |       |
| <=10%                     | 1,015 | 100   | 1,115 |
| >10%                      | 4191  | 2,819 | 7,010 |
| Total                     | 5,206 | 2,919 | 8,125 |

People with events

|              | <=10% | >10% | Total |
|--------------|-------|------|-------|
| ACC/AHA PCEs |       |      |       |
| <=10%        | 30    | 20   | 50    |
| >10%         | 292   | 528  | 820   |
| Total        | 322   | 548  | 870   |

NRI

3.476849796

**Web Extra Material Table 3.** Reclassification numbers and net reclassification indices by outcome, for the validation cohort for which both UKPDS and newer equations were available for the same outcomes (Look AHEAD study,  $N = 4,760$ , 2001-2012). Risk predictions from new equations derived from the ACCORD study sample ( $N = 9,635$ , 2001-2009) compared to predictions of older risk equations from the UK Prospective Diabetes Study Outcomes Model 2 (UKPDS OM2) and the American College of Cardiology/American Heart Association Pooled Cohort Equations (ACC/AHA PCEs). The tables show how many people with and without observed events were correctly and incorrectly classified as high or low risk by the older risk equations and by the newer risk equations.

(A)

ASCVD

New RECODE equations

|                           |       | <=10% | >10%  | Total |
|---------------------------|-------|-------|-------|-------|
| People without any events |       |       |       |       |
| UKPDS OM2                 | <=10% | 282   | 7     | 289   |
|                           | >10%  | 2682  | 1,307 | 3,989 |
|                           | Total | 2,964 | 1,314 | 4,278 |

People with events

|           |     | <=10% | >10% | Total |
|-----------|-----|-------|------|-------|
| UKPDS OM2 |     |       |      |       |
| <=10%     | 6   | 2     | 8    |       |
| >10%      | 162 | 291   | 453  |       |
| Total     | 168 | 293   | 461  |       |

NRI

8.970714196

(B)

MI

New RECODE equations

People without any events

UKPDS OM2

|       | <=5%  | >5% | Total |
|-------|-------|-----|-------|
|       |       |     |       |
| <=5%  | 1,640 | 131 | 1,771 |
| >5%   | 1881  | 756 | 2,637 |
|       |       |     |       |
| Total | 3,521 | 887 | 4,408 |

People with events

UKPDS OM2

|       | <=5% | >5% | Total |
|-------|------|-----|-------|
|       |      |     |       |
| <=5%  | 37   | 10  | 47    |
| >5%   | 122  | 162 | 284   |
|       |      |     |       |
| Total | 159  | 172 | 331   |

NRI

0.924253226

(C)

Stroke

New RECODE equations

|                           | <=5%  | >5% | Total |
|---------------------------|-------|-----|-------|
| People without any events |       |     |       |
| UKPDS OM2                 |       |     |       |
| <=5%                      | 2,845 | 10  | 2,855 |
| >5%                       | 1627  | 100 | 1,727 |
| Total                     | 4,472 | 110 | 4,582 |

People with events

|           | <=5% | >5% | Total |
|-----------|------|-----|-------|
| UKPDS OM2 |      |     |       |
| <=5%      | 64   | 0   | 64    |
| >5%       | 86   | 7   | 93    |
| Total     | 150  | 7   | 157   |

NRI

0.506704087



(D)

CHF

New RECODE equations

People without any events

UKPDS OM2

|       | <=10% | >10% | Total |
|-------|-------|------|-------|
|       |       |      |       |
| <=10% | 1,351 | 77   | 1,428 |
| >10%  | 2756  | 345  | 3,101 |
|       |       |      |       |
| Total | 4,107 | 422  | 4,529 |

People with events

UKPDS OM2

|       | <=10% | >10% | Total |
|-------|-------|------|-------|
|       |       |      |       |
| <=10% | 31    | 10   | 41    |
| >10%  | 87    | 82   | 169   |
|       |       |      |       |
| Total | 118   | 92   | 210   |

NRI

1.800142184

(E)

ACC/AHA ASCVD

New RECODe equations

|                           | <=10% | >10%  | Total |
|---------------------------|-------|-------|-------|
| People without any events |       |       |       |
| ACC/AHA PCEs              |       |       |       |
| <=10%                     | 1,641 | 143   | 1,784 |
| >10%                      | 1323  | 1,171 | 2,494 |
| Total                     | 2,964 | 1,314 | 4,278 |

People with events

|              | <=10% | >10% | Total |
|--------------|-------|------|-------|
| ACC/AHA PCEs |       |      |       |
| <=10%        | 64    | 20   | 84    |
| >10%         | 104   | 273  | 377   |
| Total        | 168   | 293  | 461   |

NRI

0.602433551

**Web Extra Material Figure 1.** Correlelogram of predicted risks by RECODE equations.

Correlations between predicted macrovascular and microvascular risk for participants in the ACCORD study ( $N = 9,635$ , 2001-2009). Nephropathy was defined as renal failure/ESRD; neuropathy as pressure sensation loss; and retinopathy as severe vision loss ( $<20/200$  visual acuity by Snellen chart). Axes are all arranged from probability 0 to probability 1 of the outcome over a predicted 10-year time horizon.

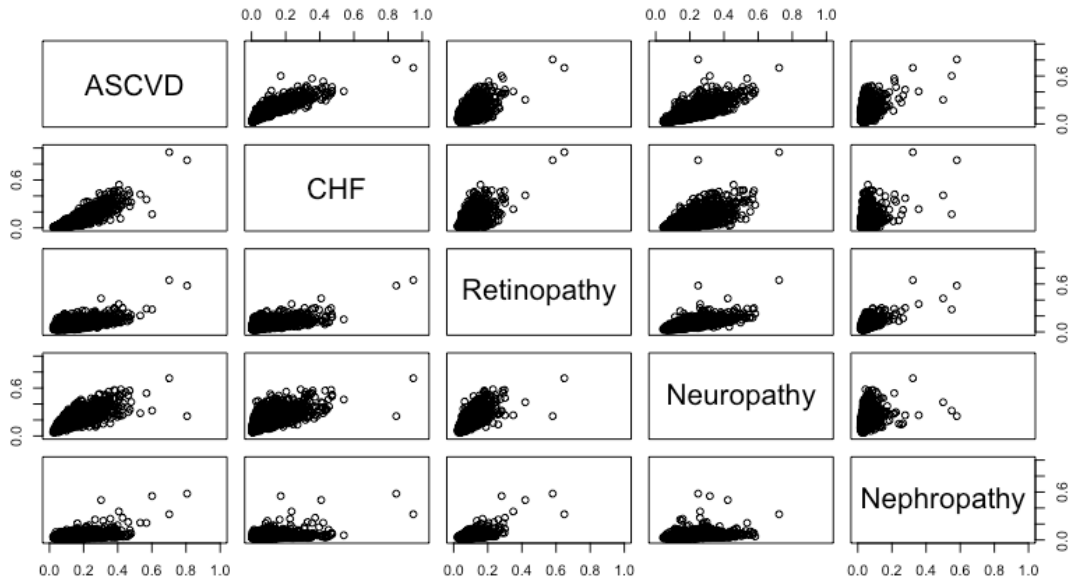

### Web Extra Material Figure 2. Calibration plots among subgroups.

Plots display Kaplan-Meier event rates over 10 years predicted by the RECODE equations versus observed rates in the ACCORD study ( $N = 9,635$ , 2001-2009), DPPPOS study ( $N = 1,018$ , 1996-2001), and Look AHEAD study ( $N = 4,760$ , 2001-2012). Also displayed, where available for each outcome, are predictions from older equations from the United Kingdom Prospective Diabetes Study Outcomes Model 2 (UKPDS OM2) and the American College of Cardiology/American Heart Association Pooled Cohort Equations (ACC/AHA PCEs) for atherosclerotic cardiovascular disease (nonfatal/fatal myocardial infarction or stroke). Points are displayed for deciles of predicted and observed Kaplan-Meier event rates, with lower numbers of centiles than deciles used if <5 events are observed per group, to prevent unstable inferences per current guidelines. Legend: MNSI = Michigan Neuropathy Screening Instrument; CVD = cardiovascular disease; ASCVD = atherosclerotic cardiovascular disease (nonfatal or fatal myocardial infarction or stroke); MI = myocardial infarction; CHF = congestive heart failure.

(A) Adults <60 years old

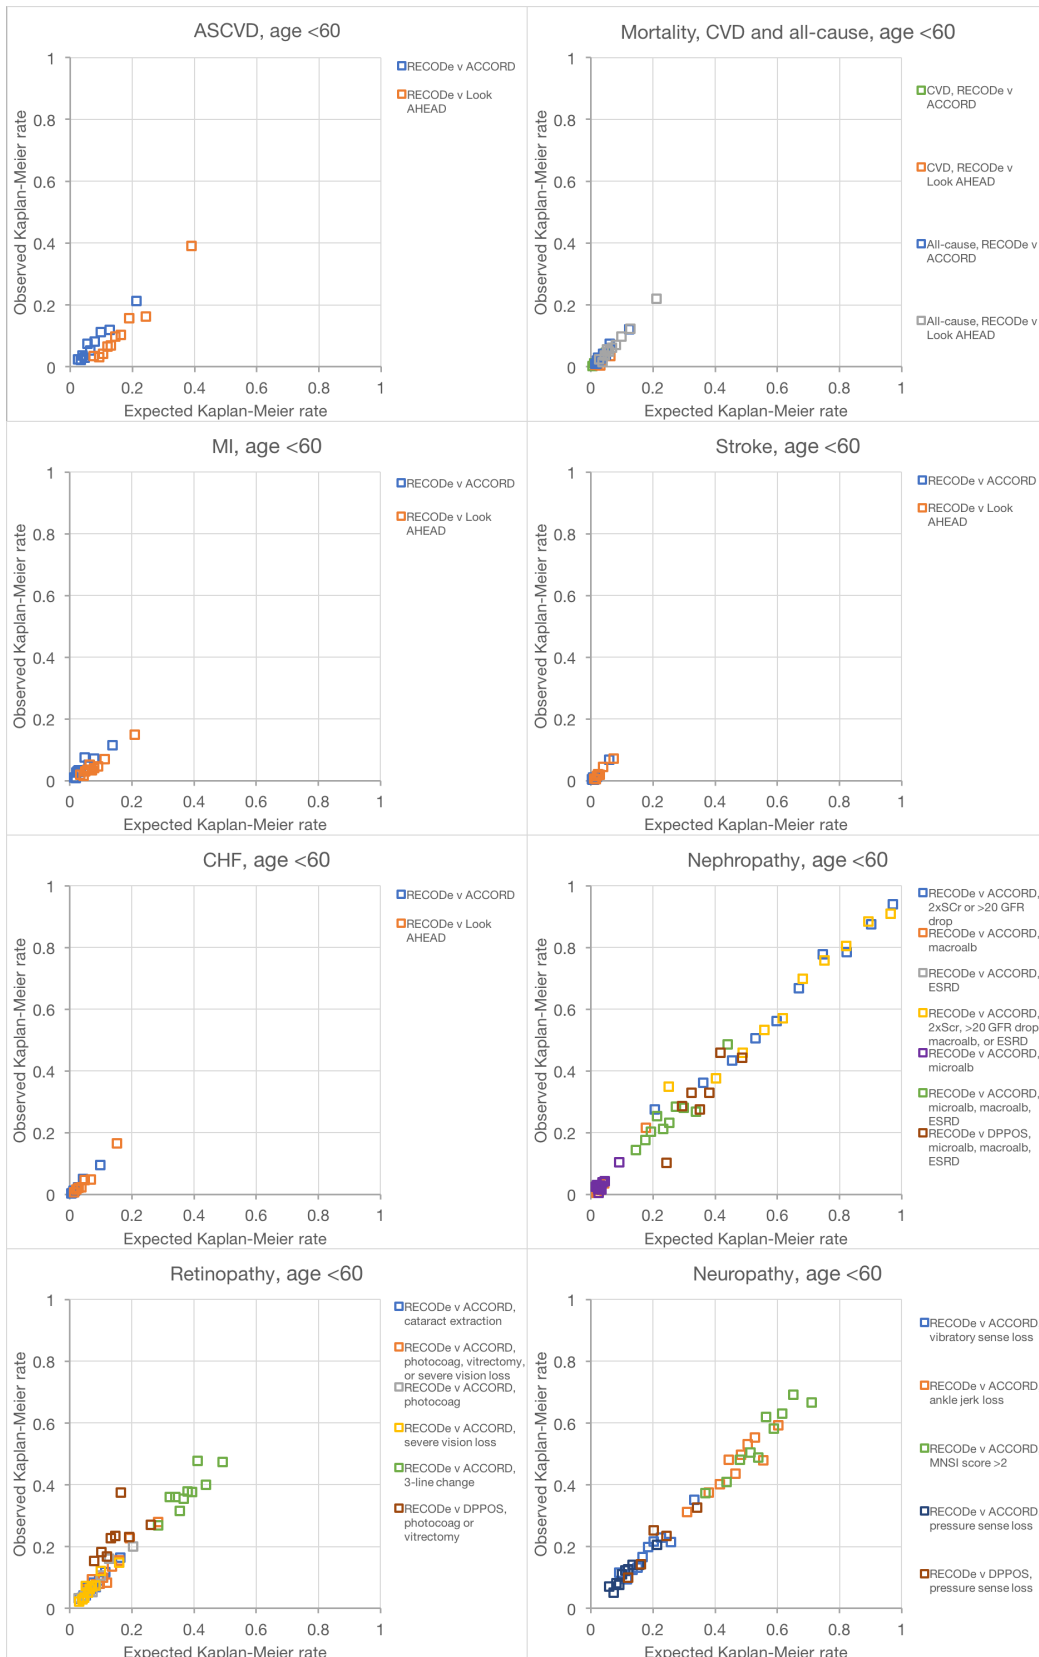

**(B) Adults ≥60 years old**

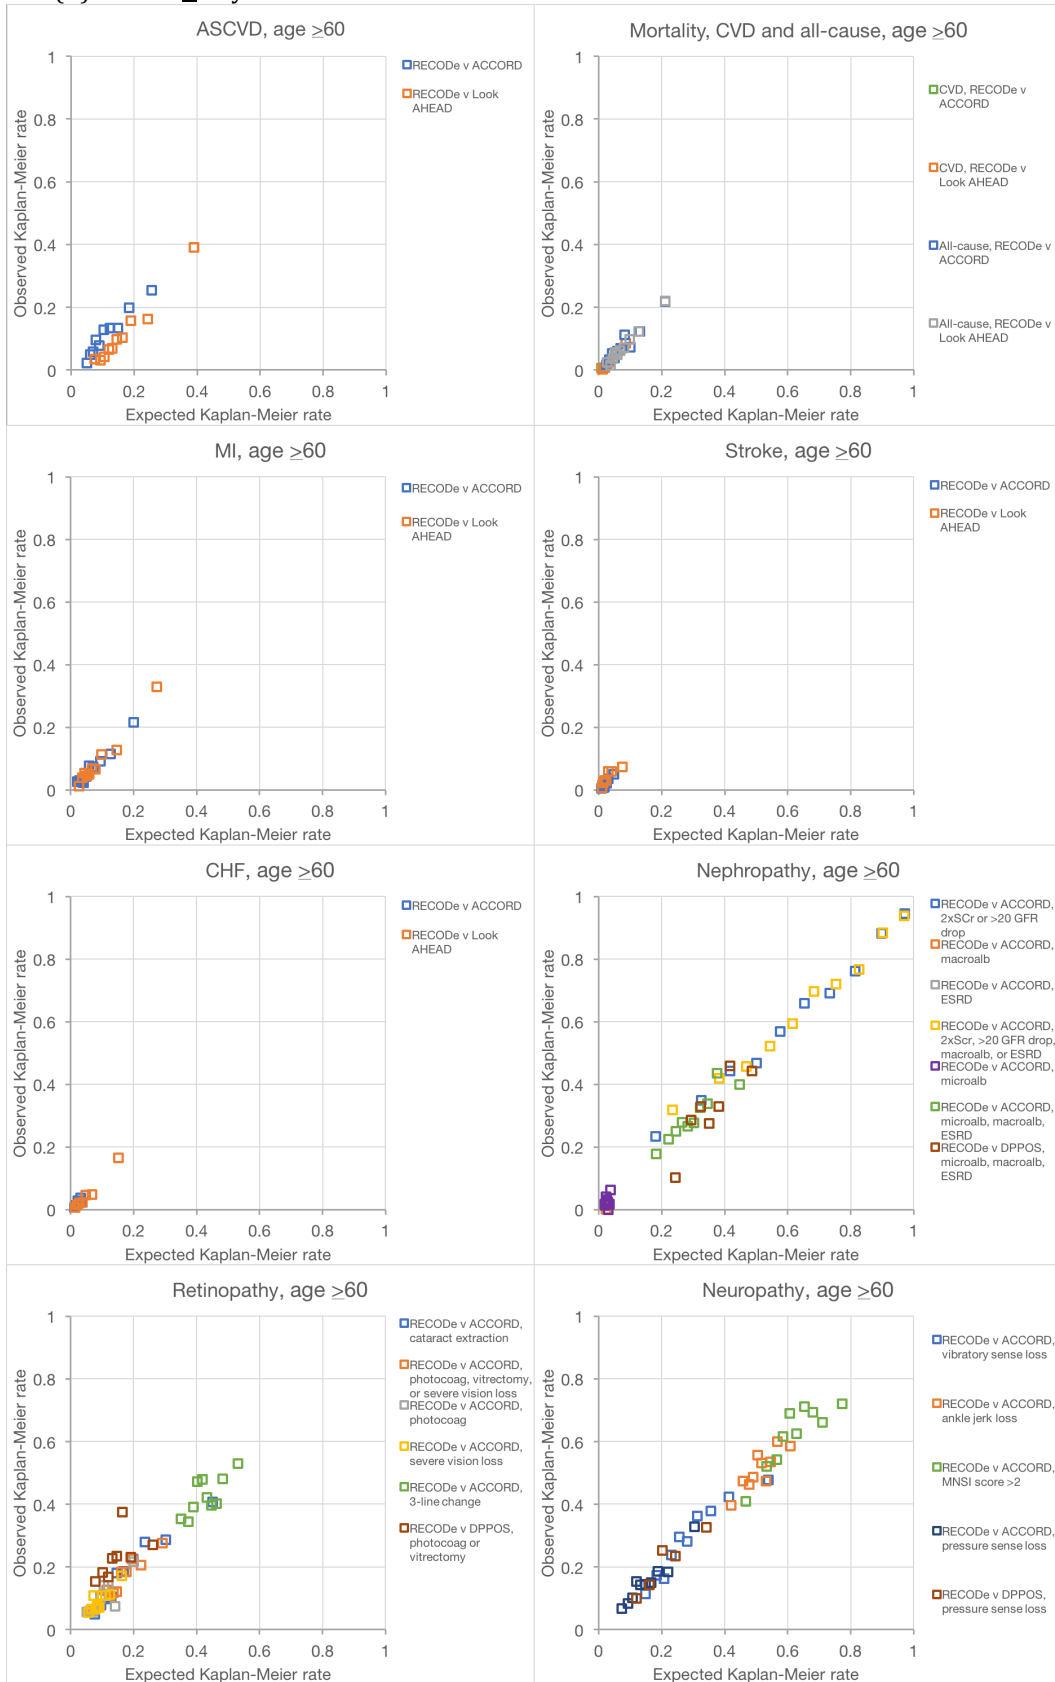

(C) White race

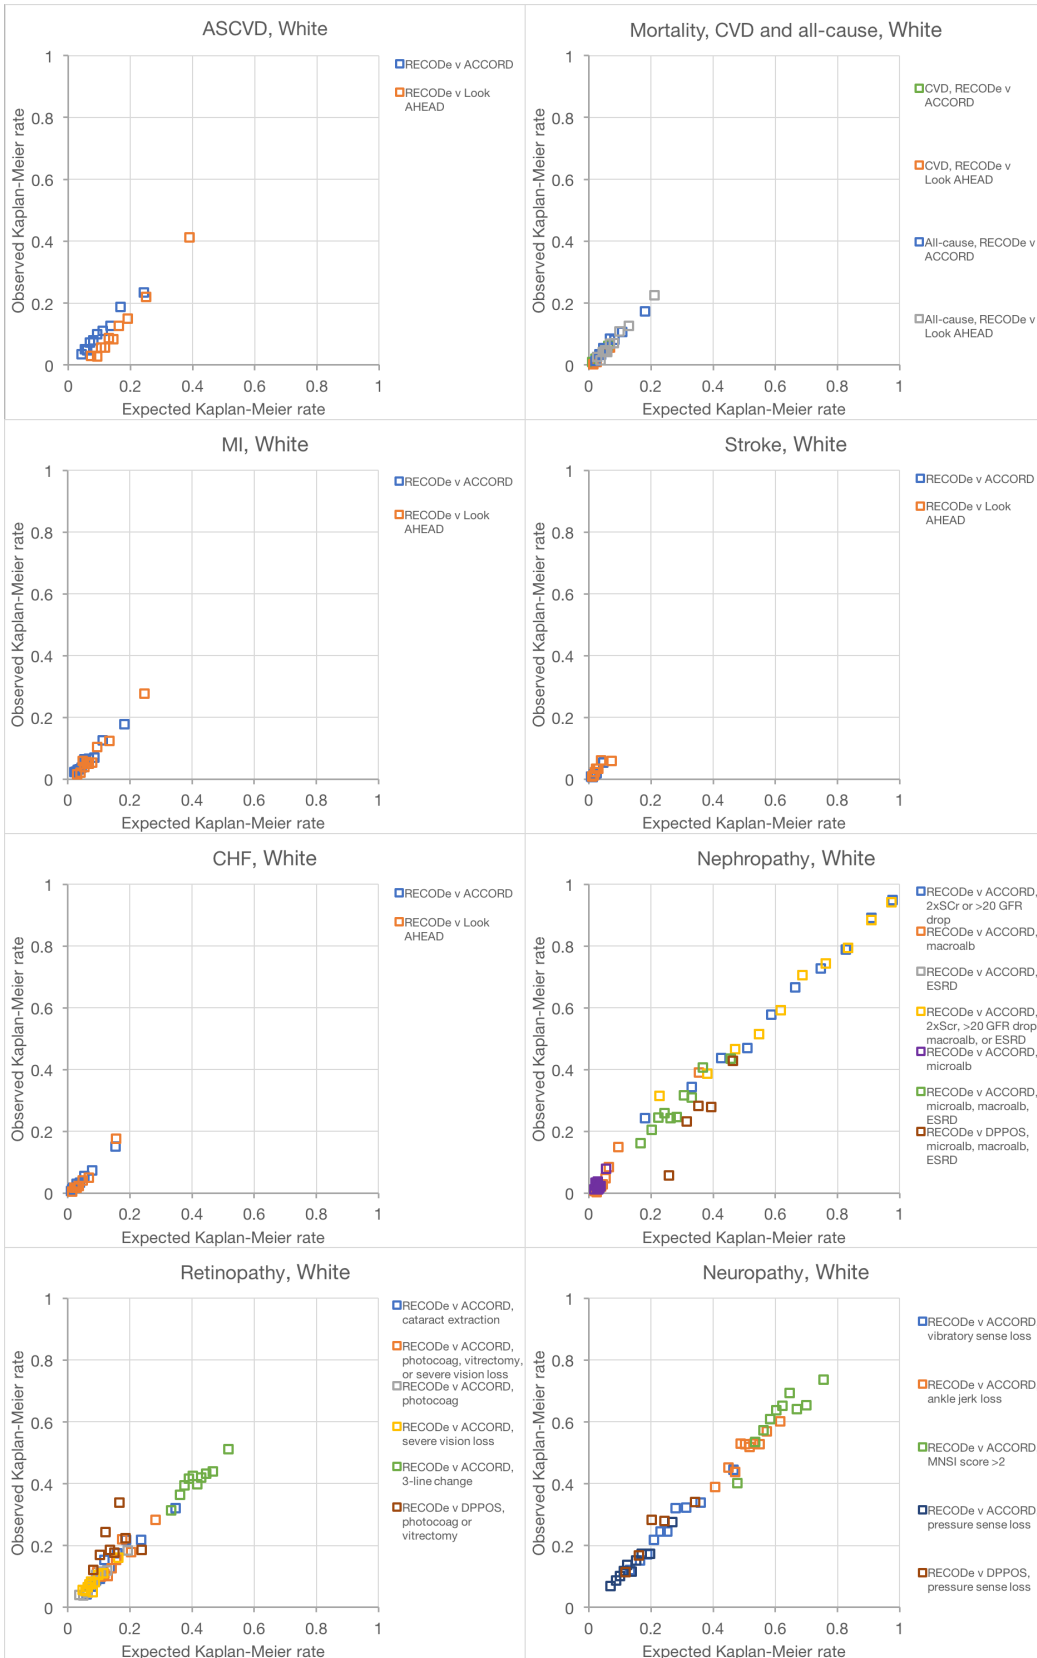

(D) Non-White race

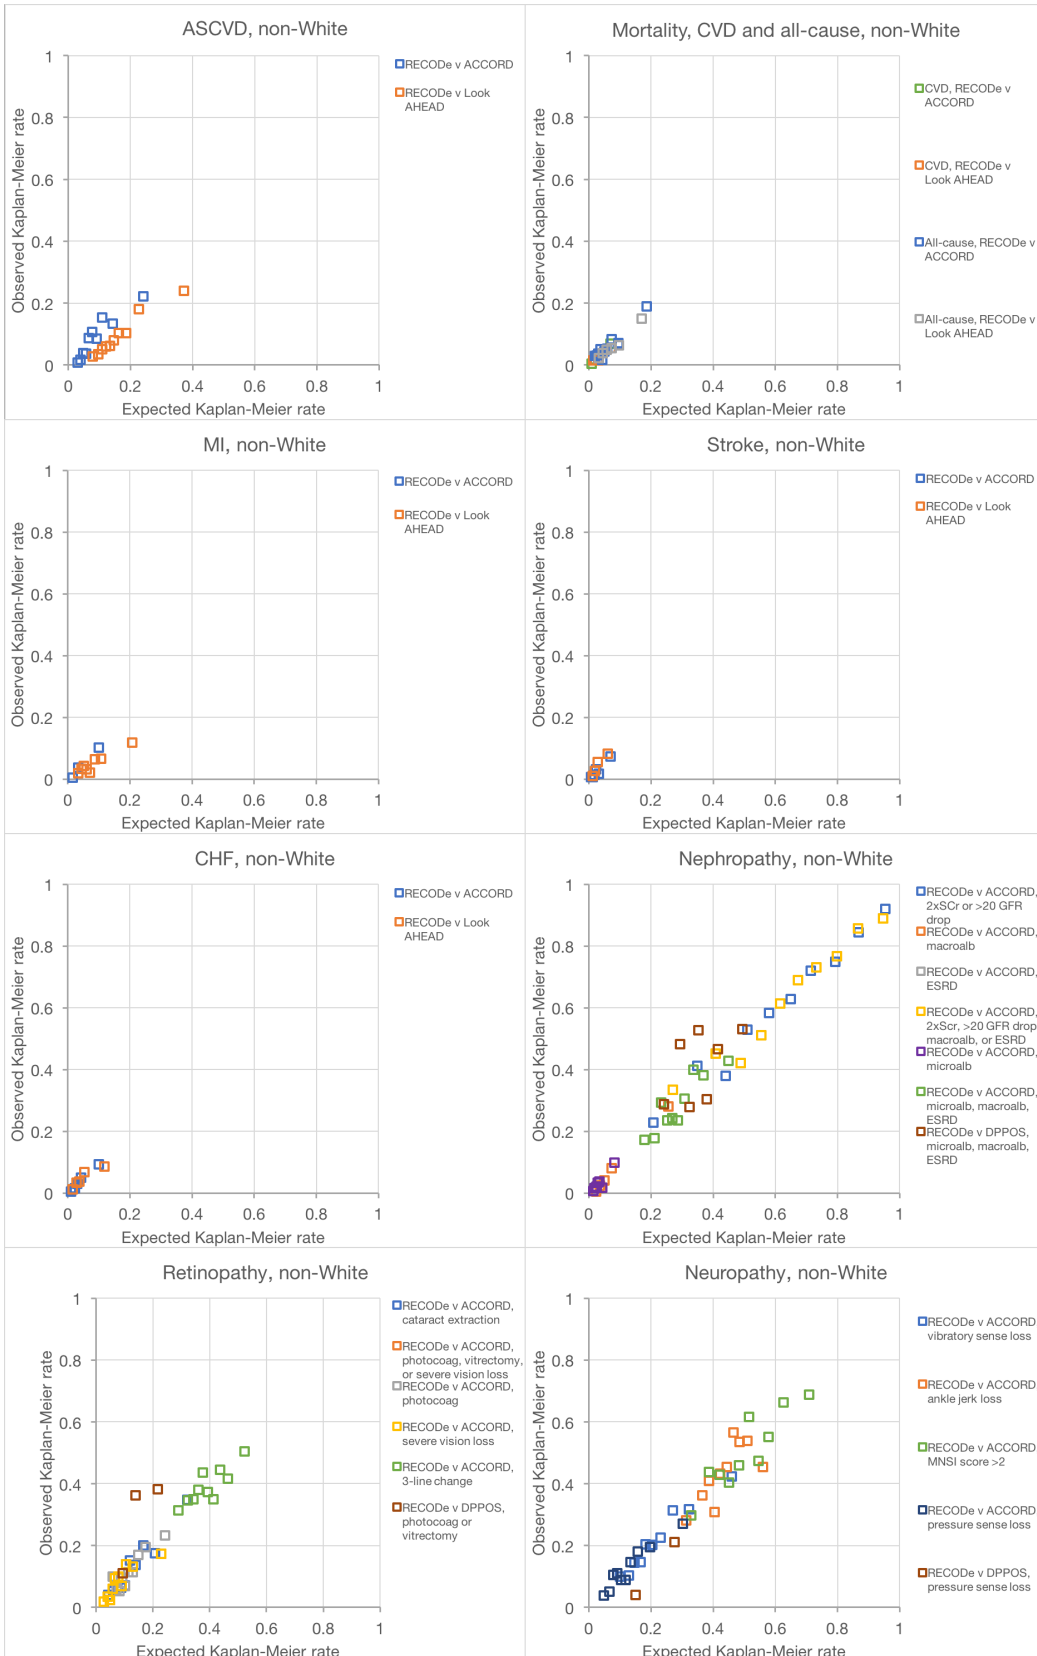

Supplement: NIHMS921271-supplement-Appendix.pdf [file NIHMS921271-supplement-Appendix.pdf]
